# Supplementary material for: Genetic influences and causal pathways shared between cannabis use disorder and other substance use traits
Source: Mol Psychiatry. 2024 Apr 5;29(9):2905–10. doi: 10.1038/s41380-024-02548-y (PMC11419938; doi:10.1038/s41380-024-02548-y)
Supplement: Supplementary file 2 — Supplementary Tables [file 41380_2024_2548_MOESM2_ESM.xlsx]

## Sheet: Index
Index of Supplementary Tables (ordered by appearance in the main text)
Supplementary Table 1	Datasets information
Supplementary Table 2	Genetic correlation analyses
Supplementary Table 3	Local genetic correlations of CanUD with SUDs and substance use traits
Supplementary Table 4	Local genetic correlations of cannabis use with SUDs and substance use traits
Supplementary Table 5	Local genetic correlations of CanUD with cannabis use
Supplementary Table 6	genomicSEM
Supplementary Table 7	Menelian Randomization analyses with CanUD as exposure 10^-5
Supplementary Table 8	Mendelian Randomization analyses with CanUD as outcome 10^-5
Supplementary Table 9	Menelian Randomization analyses with cannabis use as exposure 10^-5
Supplementary Table 10	Mendelian Randomization analyses with cannabis use as outcome 10^-5

## Sheet: Supplementary Table 1
Datasets information
Phenotype	Phenotype definition	Cases/controlsa	(Effective) sample sizea	Sample size specified for each variant	Number of independent significant variantsb	GWAS source
CanUD	case/control	42,281/843,744	161053	No	22	dbGAP request under accession phs001672.v7.p1
Cannabis use	case/control	43,380/118,702	127079	Yes	8	LDhub (http://ldsc.broadinstitute. org/gwashare/)
Opioid Use Disorder	case/control	20,686/618,377	56994	No	3	dbGAP request under accession phs001672.v7.p1
Problematic Alcohol Use	continuous	-	502272	Yes	85	dbGAP request under accession phs001672.v7.p1
Drinks Per Week	continuous	-	666978	Yes	501	https://conservancy.umn.edu/handle/11299/241912
FTND	continuous	-	46213	No	10	dbGaP accession number phs001532.v1.p1
Cigarettes Per Day	continuous	-	326497	Yes	153	https://conservancy.umn.edu/handle/11299/241912
Current versus Former Smokers	case/control	121754/266,599	370764	Yes	125	https://conservancy.umn.edu/handle/11299/241912
Smoking Initiation	case/control	393,707/411,724	805028	Yes	1751	https://conservancy.umn.edu/handle/11299/241912
aFor cannabis use, drinks per week, cigarettes per day, current versus former smokers and smoking initiation, cases, controls and sample size are reported without 23andME dataset.
bFor cannabis use, drinks per week, cigarettes per day, current versus former smokers and smoking initiation, the number of significant loci also includes 23andME dataset, as reported in the cited paper.

## Sheet: Supplementary Table 2
Genetic correlation analyses
trait1	trait2	rg	se	z	p
CanUD	CigDay	0.2235	0.0473	4.7205	2.3524e-06
CanUD	DrinkPerWeek	0.3726	0.0254	14.659	1.1798e-48
CanUD	FTND	0.4165	0.0585	7.1244	1.045e-12
CanUD	opioidUseDis	0.8625	0.0421	20.4935	2.4621e-93
CanUD	PAU	0.6805	0.0241	28.2735	7.3178e-176
CanUD	SmkCes	0.4008	0.0292	13.708	9.0934e-43
CanUD	SmkInit	0.621	0.0196	31.6968	1.721e-220
Cannabis Use	CigDay	-0.0635	0.0359	-1.7676	0.0771
Cannabis Use	DrinkPerWeek	0.4079	0.0327	12.4897	8.4924e-36
Cannabis Use	FTND	0.0469	0.0609	0.7696	0.4415
Cannabis Use	opioidUseDis	0.2949	0.064	4.6072	4.082e-06
Cannabis Use	PAU	0.3283	0.034	9.6675	4.1418e-22
Cannabis Use	SmkCes	-0.0881	0.0335	-2.6292	0.0086
Cannabis Use	SmkInit	0.5119	0.0226	22.637	1.8747e-113
Statistical differences among genetic correlations
trait	rg CUD	se CUD	rg cannabis use	se cannabis use	Z	p-value
CigDay	0.2235	0.0473	-0.0635	0.0359	-4.8332	1.34357e-06
DrinkPerWeek	0.3726	0.0254	0.4079	0.0327	0.852535	0.393917
FTND	0.4165	0.0585	0.0469	0.0609	-4.37678	1.20444e-05
opioidUseDis	0.8625	0.0421	0.2949	0.064	-7.40939	1.26886e-13
PAU	0.6805	0.0241	0.3283	0.034	-8.4511	2.88573e-17
SmkCes	0.4008	0.0292	-0.0881	0.0335	-11.0014	3.76178e-28
SmkInit	0.621	0.0196	0.5119	0.0226	-3.64697	0.000265347

## Sheet: Supplementary Table 3
Local genetic correlations of CanUD with SUDs and substance use traits
locus	chr	start	stop	n.snps	n.pcs	phen1	phen2	rho	rho.lower	rho.upper	r2	r2.lower	r2.upper	p
2079	15	78514102	79292536	2960	363	CUD	CPD	-0.375975	-0.59465	-0.19725	0.141357	0.03891	0.35361	5.36099e-05
494	3	83529395	84698480	3848	321	CUD	DPW	0.692968	0.40041	1	0.480204	0.16032	1	1.40643e-05
495	3	84698481	85807679	3892	322	CUD	DPW	0.567978	0.33666	0.82065	0.322599	0.11334	0.67346	4.38697e-06
1719	11	112755447	113889019	3750	389	CUD	DPW	0.481187	0.33502	0.63512	0.231541	0.11224	0.40338	1.55643e-09
987	6	52598880	53425492	2189	252	CUD	FTND	0.781707	0.44938	1	0.611065	0.20194	1	4.4119e-05
1719	11	112755447	113889019	1261	88	CUD	OUD	0.933006	0.75181	1	0.8705	0.56521	1	9.70784e-10
355	2	170865766	171566482	2647	355	CUD	PAU	-0.757216	-1	-0.4138	0.573376	0.17123	1	9.26993e-06
359	2	174118390	174927563	2581	371	CUD	PAU	0.669238	0.39931	0.98526	0.44788	0.15944	0.97073	4.67869e-05
766	4	182946259	183603892	2508	368	CUD	PAU	-0.6076	-1	-0.31842	0.369178	0.10139	1	2.38778e-05
1719	11	112755447	113889019	3373	356	CUD	PAU	0.37841	0.25058	0.50797	0.143194	0.06279	0.25803	3.76711e-07
1776	12	34340496	38108284	2624	116	CUD	PAU	-0.747511	-1	-0.5129	0.558773	0.26307	1	3.10634e-08
1944	13	106313848	107037864	2539	350	CUD	PAU	-0.594136	-0.93736	-0.32306	0.352997	0.10437	0.87864	1.67298e-05
2025	14	98885323	99474533	2589	315	CUD	PAU	-0.791193	-1	-0.43586	0.625986	0.18998	1	7.25295e-06
2141	16	61092845	62607090	3923	379	CUD	PAU	-0.643705	-0.97628	-0.38159	0.414356	0.14561	0.95312	1.5302e-06
2462	22	16050213	17587474	1325	213	CUD	PAU	-0.586545	-0.92224	-0.31387	0.344035	0.09851	0.85053	3.62999e-05
62	1	72513120	73992170	4444	332	CUD	SmkInit	0.517502	0.27653	0.78678	0.267809	0.07647	0.61903	5.54541e-05
63	1	73992171	75132092	2992	368	CUD	SmkInit	0.681652	0.46149	0.92488	0.464649	0.21298	0.8554	1.96853e-08
226	2	22429641	23538527	3882	410	CUD	SmkInit	0.781135	0.45875	1	0.610172	0.21045	1	9.25774e-06
464	3	47588462	50387742	4968	370	CUD	SmkInit	0.52583	0.32451	0.73837	0.276498	0.1053	0.54519	1.21478e-06
494	3	83529395	84698480	3847	321	CUD	SmkInit	0.526687	0.29663	0.7973	0.277399	0.08799	0.63569	1.87878e-05
495	3	84698481	85807679	4034	317	CUD	SmkInit	0.601699	0.426	0.78789	0.362042	0.18147	0.62077	7.84588e-10
496	3	85807680	86660979	2979	314	CUD	SmkInit	0.593846	0.38142	0.83368	0.352653	0.14548	0.69502	4.65262e-07
827	5	59868568	60930753	2842	301	CUD	SmkInit	0.596318	0.34099	0.88976	0.355595	0.11627	0.79168	1.76305e-05
1272	8	26679136	27406511	3261	336	CUD	SmkInit	0.451118	0.26551	0.64628	0.203507	0.0705	0.41767	6.14591e-06
1273	8	27406512	28344176	3334	400	CUD	SmkInit	0.673098	0.44634	0.94133	0.453062	0.19922	0.88609	9.16591e-08
1719	11	112755447	113889019	3760	389	CUD	SmkInit	0.558697	0.44331	0.67729	0.312142	0.19653	0.45872	4.02659e-17

## Sheet: Supplementary Table 4
Local genetic correlations of cannabis use with SUDs and substance use traits
locus	chr	start	stop	n.snps	n.pcs	phen1	phen2	rho	rho.lower	rho.upper	r2	r2.lower	r2.upper	p
781	5	4636543	5828694	3908	362	CanUse	CPD	0.70045	0.39965	1	0.49063	0.15972	1	1.06459e-05
1719	11	112755447	113889019	3149	310	CanUse	CPD	-0.561643	-0.78835	-0.3527	0.315443	0.1244	0.62149	1.02421e-06
1958	14	23985937	24906056	2254	305	CanUse	CPD	0.670156	0.38301	1	0.449109	0.1467	1	1.62884e-05
2089	15	89385188	90632718	3355	352	CanUse	CPD	-0.697481	-1	-0.39859	0.48648	0.15888	1	1.42059e-05
495	3	84698481	85807679	3141	195	CanUse	DPW	0.77399	0.56876	0.99747	0.599061	0.32349	0.99494	7.52296e-10
2275	18	46558307	47455925	2660	244	CanUse	DPW	-0.78542	-1	-0.45714	0.616885	0.20898	1	1.37076e-05
495	3	84698481	85807679	1954	59	CanUse	OUD	0.950489	0.65591	1	0.903429	0.43022	1	5.11622e-06
142	1	187072606	187757076	2178	209	CanUse	PAU	0.656211	0.40374	0.94758	0.430612	0.16301	0.8979	8.87715e-06
966	6	32629240	32682213	894	68	CanUse	PAU	-0.450453	-0.59828	-0.30608	0.202908	0.09369	0.35794	1.09174e-08
1209	7	130418705	131856481	3676	373	CanUse	PAU	0.604265	0.41731	0.80304	0.365136	0.17415	0.64487	1.00217e-08
1328	8	98132520	99388944	3343	328	CanUse	PAU	0.855691	0.65491	1	0.732207	0.42891	1	1.92651e-12
1467	9	122677720	124119883	2746	317	CanUse	PAU	0.691339	0.46439	0.96775	0.477949	0.21566	0.93654	1.65185e-07
1585	10	109579150	110358382	2755	227	CanUse	PAU	0.704495	0.48716	0.96658	0.496313	0.23733	0.93427	1.55155e-07
2391	20	19957929	21682377	3785	352	CanUse	PAU	0.629515	0.36525	0.94091	0.396289	0.13341	0.88531	1.58399e-05
346	2	160200380	161432089	3720	283	CanUse	SmkCes	-0.7759	-1	-0.49621	0.60202	0.24622	1	5.07924e-07
495	3	84698481	85807679	3305	193	CanUse	SmkCes	-0.667987	-0.98633	-0.40005	0.446207	0.16004	0.97286	9.86273e-06
1836	12	106153788	106964977	2280	301	CanUse	SmkCes	-0.571449	-0.8291	-0.33404	0.326554	0.11158	0.68741	6.15491e-06
106	1	120345067	145803848	443	110	CanUse	SmkInit	-0.477846	-0.63216	-0.32493	0.228337	0.10558	0.39962	5.73615e-09
247	2	42307419	43295776	2723	298	CanUse	SmkInit	0.879061	0.61202	1	0.772748	0.37457	1	7.6605e-08
353	2	169224446	170155561	2661	313	CanUse	SmkInit	0.638421	0.38447	0.95266	0.407581	0.14782	0.90756	1.24577e-05
495	3	84698481	85807679	3289	193	CanUse	SmkInit	0.730735	0.56168	0.91314	0.533974	0.31549	0.83382	8.73525e-12
521	3	116498571	117241644	2408	287	CanUse	SmkInit	0.668889	0.41114	0.96191	0.447412	0.16903	0.92528	6.553e-06
896	5	145319097	147180171	4503	357	CanUse	SmkInit	0.858158	0.53029	1	0.736435	0.28121	1	6.61262e-06
1531	10	46327145	49197320	667	95	CanUse	SmkInit	0.67923	0.43795	0.95862	0.461353	0.1918	0.91895	4.2907e-06
1581	10	104206838	106142283	4580	325	CanUse	SmkInit	0.545741	0.34491	0.75786	0.297833	0.11896	0.57435	8.00853e-07
1628	11	16383387	17583948	2910	296	CanUse	SmkInit	0.774047	0.50232	1	0.599149	0.25233	1	3.24752e-06
1719	11	112755447	113889019	3132	310	CanUse	SmkInit	0.606079	0.44781	0.76654	0.367332	0.20053	0.58758	2.03667e-11
1849	12	120567741	121817509	3717	286	CanUse	SmkInit	0.788673	0.54286	1	0.622005	0.2947	1	1.15689e-07
1856	12	128372589	129170296	2882	347	CanUse	SmkInit	0.650767	0.41508	0.91655	0.423497	0.17229	0.84007	1.50427e-06
2337	19	30375793	31763008	3135	367	CanUse	SmkInit	0.645547	0.38429	0.94977	0.416731	0.14768	0.90207	1.00861e-05
2366	19	56411087	57143509	2709	340	CanUse	SmkInit	0.752563	0.54153	1	0.566351	0.29326	1	2.82021e-09

## Sheet: Supplementary Table 5
Local genetic correlations of CanUD with cannabis use
locus	chr	start	stop	n.snps	n.pcs	phen1	phen2	rho	rho.lower	rho.upper	r2	r2.lower	r2.upper	p
9	1	6136815	7711794	4405	373	CUD	CanUse	0.73591	0.40852	1	0.541564	0.16689	1	2.78505e-05
521	3	116498571	117241644	2428	289	CUD	CanUse	0.639658	0.38055	0.94198	0.409163	0.14482	0.88733	4.33649e-06
592	3	195196790	195710290	1393	254	CUD	CanUse	0.335651	0.17211	0.50679	0.112662	0.02962	0.25684	8.79968e-05
965	6	32586785	32629239	1162	191	CUD	CanUse	-0.266192	-0.38249	-0.14412	0.0708579	0.02077	0.1463	1.67887e-05
1415	9	38822978	43903829	201	36	CUD	CanUse	-0.846713	-1	-0.60392	0.716922	0.36471	1	7.96561e-07
1673	11	62800369	64594822	4051	331	CUD	CanUse	0.650759	0.35094	1	0.423488	0.12316	1	5.4587e-05

## Sheet: Supplementary Table 6
genomicSEM
# EFA 4 Factors
Uniquenesses:
	CanUD	OUD	CanUse	CigsPerDay	DPW	FTND	PAU	SmkCes	SmkInit
	0.005	0.128	0.005	0.392	0.005	0.005	0.141	0.585	0.483
Loadings:
	Factor1	Factor2	Factor3	Factor4
CanUD	1.114		-0.209	0.124
OUD	0.963
CanUse				0.969
CigsPerDay	-0.13	0.84
DPW	-0.181		1.081
FTND		1.046
PAU	0.555		0.537
SmkCes	0.31	0.412		-0.219
SmkInit	0.349	0.225		0.342
	Factor1	Factor2	Factor3	Factor4
SS loadings	2.754	2.033	1.51	1.145
Proportion Var	0.306	0.226	0.168	0.127
Cumulative Var	0.306	0.532	0.7	0.827
Factor	Correlations:
	Factor1	Factor2	Factor3	Factor4
Factor1	1	0.5548	0.614	0.3202
Factor2	0.555	1	0.28	-0.0357
Factor3	0.614	0.2801	1	0.3203
Factor4	0.32	-0.0357	0.32	1
# CFA 4 Factors (Smoking Initiation loading on Factor 1 and Factor 4) **BEST FITTING CFA**
modelfit
	chisq	df	p_chisq	AIC	CFI	SRMR
df	243.801	22	2.49076e-39	289.801	0.965476	0.0726136
results
lhs	rhs	Unstand_Est	Unstand_SE	STD_Genotype	STD_Genotype_SE	STD_All	p_value
F1	CanUD	0.213598	0.00664416	0.859233	0.0267823	0.889804	9.34742e-227
F1	OUD	0.370534	0.0205624	0.863103	0.0479071	0.863103	1.35821e-72
F1	PAU	0.123285	0.0350484	0.469748	0.131185	0.469748	0.000435555
F1	SmkInit	0.20769	0.0102551	0.701636	0.0346073	0.701636	3.39361e-91
F2	CigsPerDay	0.152962	0.00726782	0.560463	0.0266528	0.560463	2.46037e-98
F2	FTND	0.246719	0.0141514	0.884299	0.0510058	0.895028	4.53617e-68
F2	SmkCes	0.171942	0.00818748	0.781007	0.0372159	0.781007	6.47283e-98
F3	DPW	0.212417	0.0338764	0.914927	0.148995	0.900947	3.60212e-10
F3	PAU	0.143054	0.041505	0.531886	0.156012	0.531886	0.000567542
F4	CanUse	0.241422	0.065706	0.917025	0.255235	0.901335	0.000238529
F4	SmkInit	0.0317505	0.0132731	0.103182	0.0445509	0.103182	0.0167527
CanUD	CanUD	0.0115786	0.00325539	0.194184	0.0528226	0.208248	0.000375477
FTND	FTND	0.0115786	0.0102134	0.194184	0.132796	0.198925	0.25693
DPW	DPW	0.0115783	0.0144882	0.194184	0.27435	0.188295	0.424202
CanUse	CanUse	0.0115785	0.0307137	0.194184	0.453052	0.187596	0.706186
OUD	OUD	0.0468288	0.0154211	0.255053	0.0837575	0.255053	0.00239202
CigsPerDay	CigsPerDay	0.0509531	0.00336072	0.685882	0.0452066	0.685882	6.37259e-52
PAU	PAU	0.0153982	0.00727053	0.223124	0.102855	0.223124	0.0341842
SmkCes	SmkCes	0.0189664	0.00282778	0.390029	0.0583397	0.390029	1.98457e-11
SmkInit	SmkInit	0.0369786	0.00251455	0.41963	0.0285018	0.41963	5.9112e-49
F1	F2	0.652031	0.0376074	0.652939	0.0377532	0.652939	2.43784e-67
F1	F3	0.551233	0.0889675	0.546943	0.0900629	0.546943	5.79576e-10
F1	F4	0.524632	0.155502	0.534773	0.162022	0.534773	0.00074142
F2	F3	0.212179	0.0547963	0.209718	0.0547891	0.209718	0.000107883
F2	F4	-0.0697191	0.0423814	-0.0715661	0.0433111	-0.0715661	0.0999618
F3	F4	0.409682	0.124465	0.412852	0.128457	0.412852	0.000996445
F1	F1	1	1	1	NA
F2	F2	1	1	1	NA
F3	F3	1	1	1	NA
F4	F4	1	1	1	NA

## Sheet: Supplementary Table 7
Menelian randomization analyses with CanUD as exposure 10^-5
trait	N	observed_effect	observed_effect_SE	observed_p-value	corrected_effect	corrected_effect_SE	corrected_p-value	test_difference	p-value_difference
CPD	80	0.091116	0.0258113	0.00041543	0.150323	0.045318	0.000909638	-3.04611	0.00231823
DPW	148	0.127432	0.0174823	3.11833e-13	0.18161	0.0248323	2.60344e-13	-6.92993	4.21043e-12
FTND	139	0.145404	0.0357296	4.71027e-05	0.182796	0.0518238	0.000419893	-2.32737	0.0199457
OpioidUseDisorder	83	0.640289	0.047065	3.77312e-42	0.925361	0.0816673	9.22954e-30	-7.9394	2.03166e-15
PAU	153	0.327852	0.0208031	5.88331e-56	0.442534	0.0297775	5.87116e-50	-11.7303	8.91485e-32
SmkCes	73	0.0951707	0.0287846	0.000945337	0.177516	0.0518808	0.000622504	-3.40819	0.000653962
SmkInit	80	0.230064	0.0240009	9.1913e-22	0.404713	0.0421994	8.76708e-22	-8.81827	1.16238e-18

## Sheet: Supplementary Table 8
Mendelian Randomization analyses with CanUD as outcome 10^-5
trait	N	observed_effect	observed_effect_SE	observed_p-value	corrected_effect	corrected_effect_SE	corrected_p-value	test_difference	p-value_difference
CPD	327	0.0113003	0.0164416	0.491894	0.00843689	0.0197357	0.66902	0.929557	0.3526
DPW	297	0.0812609	0.0230251	0.000416775	0.102365	0.0295514	0.00053228	-3.19299	0.00140809
FTND	27	-0.00283132	0.0304718	0.92597	-0.0339708	0.0738884	0.64569	0.715077	0.474561
OpioidUseDisorder	32	0.246979	0.0334184	1.46273e-13	0.547841	0.0975782	1.97269e-08	-4.4486	8.64311e-06
PAU	392	0.427144	0.0243926	1.17751e-68	0.483205	0.0292026	1.6923e-61	-9.77592	1.42859e-22
SmkCes	330	0.155472	0.021364	3.40595e-13	0.203055	0.0276198	1.95535e-13	-6.49954	8.05671e-11
SmkInit	791	0.337906	0.0165294	6.97277e-93	0.400654	0.0198181	7e-91	-11.16	6.40038e-29

## Sheet: Supplementary Table 9
Menelian Randomization analyses with cannabis use as exposure 10^-5
trait	N	observed_effect	observed_effect_SE	observed_p-value	corrected_effect	corrected_effect_SE	corrected_p-value	test_difference	p-value_difference
CPD	43	-0.0491484	0.0286929	0.0867288	-0.0963604	0.0586297	0.100271	1.58052	0.113987
DPW	73	0.127638	0.0244459	1.77721e-07	0.195794	0.0397495	8.40656e-07	-4.1703	3.04197e-05
FTND	69	0.0349923	0.0398897	0.380364	0.0601141	0.0636411	0.344874	-0.986595	0.323841
OpioidUseDisorder	28	0.247467	0.0865065	0.0042274	0.785036	0.266262	0.00319463	-2.91554	0.00355079
PAU	80	0.16654	0.0229921	4.37642e-13	0.230061	0.0361351	1.93158e-10	-4.71391	2.43007e-06
SmkCes	43	0.0471637	0.0278154	0.0899625	0.096536	0.0565973	0.0880706	-1.7002	0.0890932
SmkInit	38	0.135705	0.0408551	0.000894986	0.254058	0.0879862	0.00388343	-2.44312	0.0145611

[truncated: 1 more sheets: Supplementary Table 10]
